# Supplementary material for: Argatroban-associated adverse events: an analysis based on FDA adverse event reporting system (FAERS)
Source: Research Square preprint supplement (doi:10.21203/rs.3.rs-6926401/v1), 2025-08-22
Supplement: Supplementary file 1 [file 4c5629fb17bb33bdf2bc93ad.docx]

**Supplementary material：**


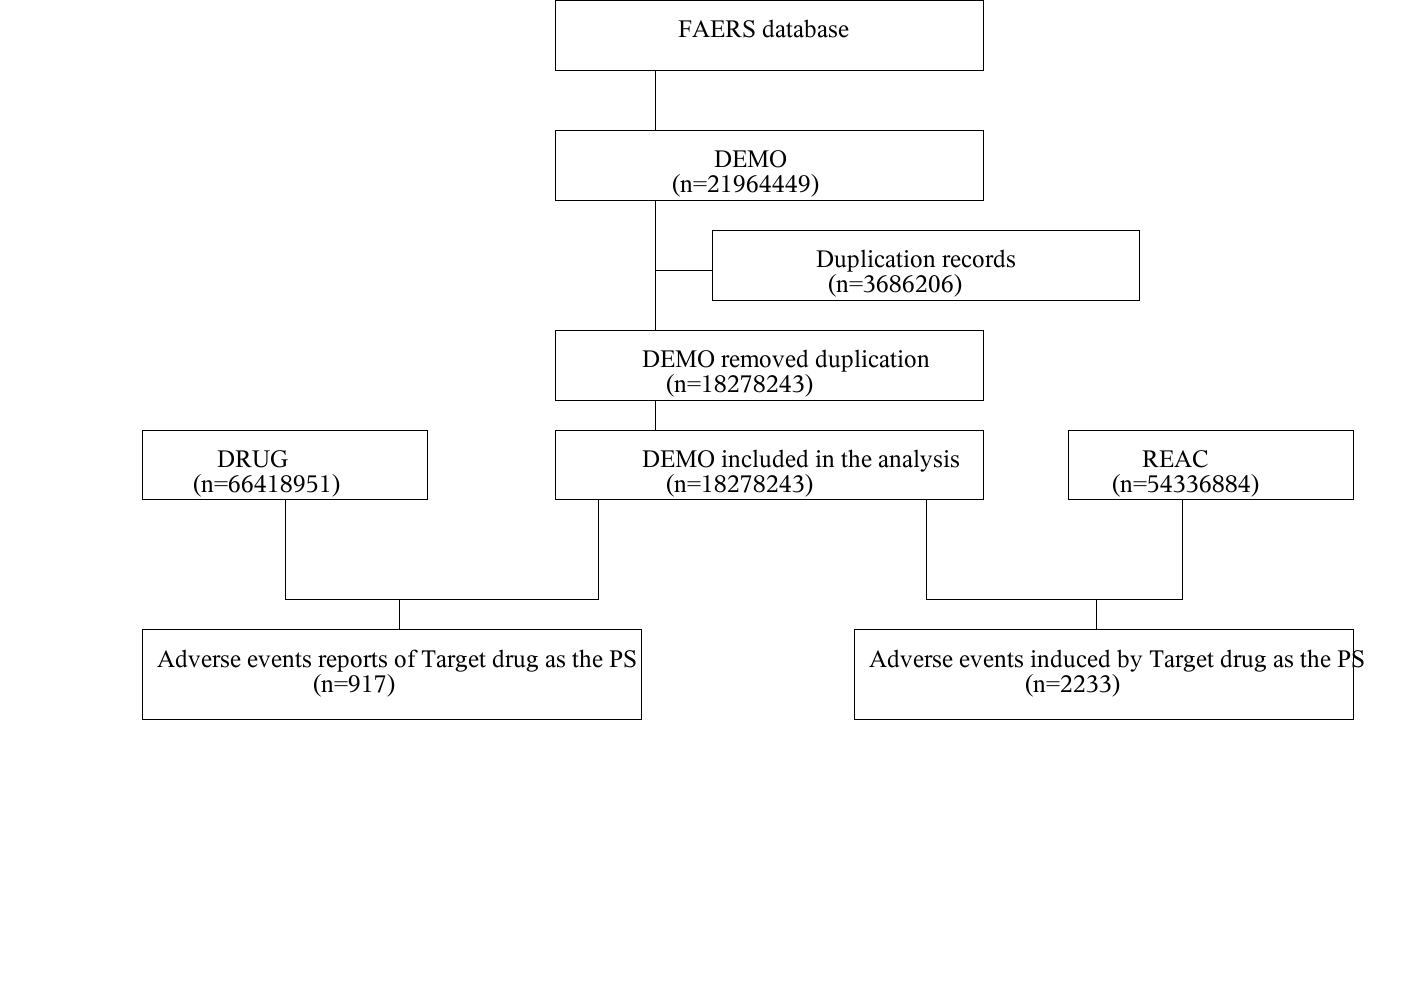


**Supplementary Figure S1.** Data filtering flowchart

**Supplementary Table S1.** 2×2 contingency table for signal detection

|  | **Target adverse drug event** | **Other adverse drug event** | **Total** |
| --- | --- | --- | --- |
| **Argatroban** | a | b | a+b |
| **Other drugs** | c | d | c+d |
| **Total** | a+c | b+d | N=a+b+c+d |

**Supplementary Table S2.** Methods, formulas, and thresholds of ROR、PRR、BCPNN and EBGM

| **Algorithms** | **Equation** | **Criteria** |
| --- | --- | --- |
| ROR | 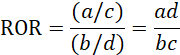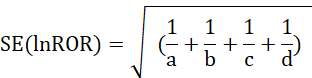  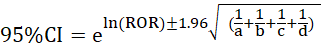 | lower limit of 95% CI>1, a≥3 |
| PRR | 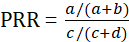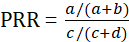  SE(lnPRR)=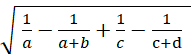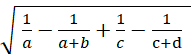  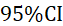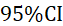=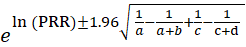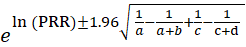 | lower limit of 95% CI>1, a≥3 |
| BCPNN | IC=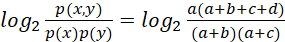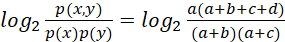  E(IC)=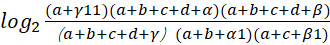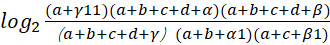  V(IC)=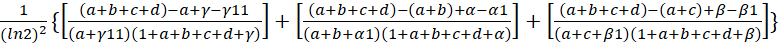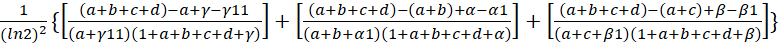  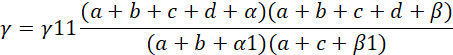  *IC-2SD=E(IC)-2*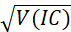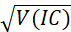  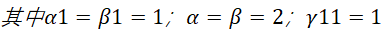 | IC025>0 |
| MGPS | 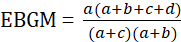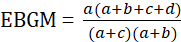  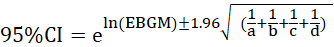 | EBGM05>2 |

**Supplementary Table S3.** The 4 × 2 contingency table for signal detection of drug-drug interaction

|  | **Target AE** | **Other AEs** | **Total** |
| --- | --- | --- | --- |
| **Concomitant use of drug D1 and drug D2** | n111 | n110 | n11+ |
| **drug D1 without drug D2** | n101 | n100 | n10+ |
| **drug D2 without drug D1** | n011 | n010 | n01+ |
| **Neither drug D1 nor drug D2** | n001 | n000 | n00+ |
| **Total** | n++1 | n++0 | n+++ |

AE: adverse event, *n*: the number of reports.

Where, *n* is the number of reports shown in the 4 × 2 contingency table.

When *f*10 < *f*00 (which denote no risk of AE caused by *drug D*1), the most sensible estimator *g*11 = max (*f*00, *f*01) is yielded and the *vice versa* when *f*01 < *f*00.

Where, *n*111 is the number of reports and *E*111 is the expected value.

Where, *ϕ* (0.975) is 97.5% of the standard normal distribution.

**Supplementary Table S4.** Signal strength of adverse events at the Preferred Term(PT) level ranked by ROR

| **Preferred Term(PT)** | **Case reports** | **ROR (95% CI)** | **PRR (95% CI)** | **IC (IC025)** | **EBGM (EBGM05)** |
| --- | --- | --- | --- | --- | --- |
| Coagulation time prolonged | 66 | 1214.10  (944.98,1559.86) | 1178.25  (923.58,1503.13) | 10.13  (5.62) | 1123.87  (874.75) |
| Activated partial thromboplastin time abnormal | 9 | 999.45  (512.52,1948.98) | 995.42  (511.78,1936.12) | 9.90  (2.37) | 956.34  (490.42) |
| Coagulation time abnormal | 8 | 760.15  (375.64,1538.27) | 757.43  (375.21,1529.02) | 9.52  (2.17) | 734.60  (363.01) |
| Activated partial thromboplastin time shortened | 8 | 512.75  (254.26,1034.04) | 510.92  (253.98,1027.81) | 8.97  (2.17) | 500.43  (248.15) |
| Haemorrhagic cerebral infarction | 12 | 450.94  (254.38,799.39) | 448.53  (253.78,792.71) | 8.78  (2.85) | 440.43  (248.45) |
| Activated partial thromboplastin time prolonged | 82 | 444.74  (356.06,555.51) | 428.45  (345.78,530.88) | 8.72  (5.79) | 421.05  (337.09) |
| Coagulation factor V level decreased | 5 | 401.10  (165.59,971.57) | 400.21  (165.54,967.51) | 8.62  (1.38) | 393.75  (162.56) |
| Bronchial haemorrhage | 4 | 350.74  (130.60,941.93) | 350.11  (130.59,938.61) | 8.43  (1.00) | 345.16  (128.52) |
| Haemorrhagic infarction | 6 | 293.95  (131.28,658.16) | 293.16  (131.21,655.00) | 8.18  (1.68) | 289.69  (129.38) |
| Hypofibrinogenaemia | 8 | 235.09  (117.03,472.24) | 234.25  (116.90,469.39) | 7.86  (2.15) | 232.02  (115.50) |
| Prothrombin time ratio decreased | 4 | 182.59  (68.22,488.72) | 182.27  (68.22,487.00) | 7.50  (0.99) | 180.92  (67.59) |
| Heparin-induced thrombocytopenia | 30 | 165.70  (115.44,237.85) | 163.49  (114.45,233.55) | 7.34  (4.19) | 162.40  (113.14) |
| Bleeding time prolonged | 7 | 151.20  (71.83,318.27) | 150.73  (71.78,316.54) | 7.23  (1.91) | 149.81  (71.17) |
| Blood fibrinogen decreased | 4 | 105.18  (39.36,281.09) | 104.99  (39.36,280.10) | 6.71  (0.97) | 104.55  (39.12) |
| Ischaemic hepatitis | 5 | 104.57  (43.40,251.97) | 104.34  (43.39,250.91) | 6.70  (1.33) | 103.90  (43.12) |
| Aortic thrombosis | 4 | 98.99  (37.05,264.51) | 98.81  (37.04,263.57) | 6.62  (0.97) | 98.42  (36.83) |
| Prothrombin time shortened | 5 | 92.87  (38.55,223.71) | 92.66  (38.54,222.78) | 6.53  (1.33) | 92.31  (38.32) |
| Embolism arterial | 4 | 90.70  (33.95,242.32) | 90.54  (33.95,241.47) | 6.50  (0.96) | 90.21  (33.76) |
| International normalised ratio increased | 95 | 87.82  (71.48,107.90) | 84.13  (69.08,102.46) | 6.39  (5.19) | 83.84  (68.24) |
| Vascular stent thrombosis | 6 | 81.51  (36.53,181.86) | 81.29  (36.51,180.99) | 6.34  (1.61) | 81.02  (36.31) |
| Prothrombin level decreased | 3 | 79.97  (25.72,248.61) | 79.87  (25.73,247.91) | 6.31  (0.50) | 79.61  (25.61) |
| Continuous haemodiafiltration | 3 | 75.98  (24.44,236.19) | 75.88  (24.45,235.52) | 6.24  (0.50) | 75.65  (24.34) |
| Brain stem infarction | 3 | 73.83  (23.75,229.50) | 73.74  (23.76,228.84) | 6.20  (0.50) | 73.52  (23.65) |
| Thrombosis in device | 8 | 61.49  (30.68,123.21) | 61.27  (30.65,122.48) | 5.93  (2.03) | 61.12  (30.50) |
| Prothrombin time prolonged | 14 | 59.19  (34.98,100.17) | 58.83  (34.87,99.23) | 5.87  (2.85) | 58.69  (34.68) |
| Catheter site haemorrhage | 5 | 56.79  (23.59,136.72) | 56.67  (23.58,136.15) | 5.82  (1.28) | 56.54  (23.48) |
| Cardiac ventricular thrombosis | 9 | 56.06  (29.11,107.97) | 55.84  (29.07,107.25) | 5.80  (2.19) | 55.71  (28.93) |
| Vena cava thrombosis | 3 | 48.50  (15.61,150.67) | 48.44  (15.62,150.25) | 5.60  (0.47) | 48.34  (15.56) |
| Venous thrombosis limb | 4 | 47.98  (17.98,128.08) | 47.90  (17.98,127.64) | 5.58  (0.91) | 47.81  (17.91) |
| Vascular pseudoaneurysm | 3 | 47.71  (15.36,148.21) | 47.65  (15.36,147.79) | 5.57  (0.47) | 47.56  (15.31) |
| Subarachnoid haemorrhage | 17 | 45.34  (28.12,73.10) | 45.00  (28.01,72.29) | 5.49  (3.02) | 44.92  (27.86) |
| Peripheral artery thrombosis | 3 | 42.03  (13.53,130.55) | 41.98  (13.54,130.18) | 5.39  (0.45) | 41.91  (13.49) |
| Pulmonary alveolar haemorrhage | 8 | 41.88  (20.91,83.91) | 41.74  (20.89,83.40) | 5.38  (1.95) | 41.67  (20.80) |
| Disseminated intravascular coagulation | 21 | 40.14  (26.11,61.71) | 39.77  (25.97,60.90) | 5.31  (3.23) | 39.71  (25.83) |
| Fibrin D dimer increased | 5 | 38.55  (16.02,92.77) | 38.46  (16.01,92.39) | 5.26  (1.23) | 38.41  (15.96) |
| Coagulopathy | 23 | 37.68  (24.98,56.84) | 37.30  (24.83,56.03) | 5.22  (3.30) | 37.24  (24.69) |
| Embolism venous | 4 | 37.41  (14.02,99.85) | 37.35  (14.02,99.50) | 5.22  (0.88) | 37.29  (13.97) |
| Retroperitoneal haematoma | 3 | 36.82  (11.86,114.36) | 36.77  (11.86,114.04) | 5.20  (0.44) | 36.72  (11.82) |
| Incorrect drug administration rate | 5 | 35.05  (14.56,84.34) | 34.97  (14.56,83.99) | 5.13  (1.21) | 34.92  (14.51) |
| Cerebral infarction | 30 | 33.53  (23.38,48.08) | 33.09  (23.19,47.22) | 5.05  (3.50) | 33.05  (23.04) |
| Peripheral ischaemia | 5 | 33.39  (13.87,80.34) | 33.31  (13.87,80.01) | 5.06  (1.20) | 33.27  (13.83) |
| Skin necrosis | 6 | 31.57  (14.16,70.39) | 31.49  (14.16,70.06) | 4.98  (1.46) | 31.45  (14.11) |
| Intraventricular haemorrhage | 3 | 31.42  (10.12,97.58) | 31.38  (10.12,97.31) | 4.97  (0.42) | 31.34  (10.09) |
| Intestinal ischaemia | 6 | 30.53  (13.70,68.07) | 30.45  (13.69,67.75) | 4.93  (1.45) | 30.42  (13.64) |
| Embolism | 9 | 29.13  (15.13,56.08) | 29.01  (15.11,55.71) | 4.86  (2.02) | 28.98  (15.05) |
| Procedural haemorrhage | 4 | 26.82  (10.05,71.57) | 26.78  (10.05,71.32) | 4.74  (0.83) | 26.75  (10.02) |
| International normalised ratio decreased | 4 | 24.65  (9.24,65.76) | 24.60  (9.24,65.53) | 4.62  (0.81) | 24.58  (9.21) |
| Cardiac tamponade | 4 | 22.95  (8.60,61.23) | 22.91  (8.60,61.02) | 4.52  (0.80) | 22.89  (8.58) |
| Thrombotic thrombocytopenic purpura | 3 | 22.75  (7.33,70.63) | 22.72  (7.33,70.43) | 4.50  (0.38) | 22.70  (7.31) |
| Cardiogenic shock | 11 | 22.42  (12.40,40.56) | 22.32  (12.37,40.25) | 4.48  (2.17) | 22.30  (12.33) |
| Pulseless electrical activity | 4 | 22.37  (8.38,59.67) | 22.33  (8.38,59.47) | 4.48  (0.79) | 22.31  (8.36) |
| International normalised ratio abnormal | 3 | 22.12  (7.12,68.66) | 22.09  (7.13,68.47) | 4.46  (0.37) | 22.07  (7.11) |
| Gangrene | 5 | 21.96  (9.13,52.83) | 21.91  (9.13,52.62) | 4.45  (1.11) | 21.89  (9.10) |
| Hypoxic-ischaemic encephalopathy | 3 | 21.32  (6.87,66.18) | 21.29  (6.87,65.99) | 4.41  (0.36) | 21.27  (6.85) |
| Muscle haemorrhage | 3 | 20.96  (6.75,65.07) | 20.93  (6.75,64.89) | 4.39  (0.36) | 20.92  (6.74) |
| Superficial vein thrombosis | 3 | 20.60  (6.64,63.95) | 20.57  (6.64,63.78) | 4.36  (0.36) | 20.56  (6.62) |
| Pulmonary haemorrhage | 6 | 20.29  (9.10,45.23) | 20.24  (9.10,45.01) | 4.34  (1.34) | 20.22  (9.07) |
| Staphylococcal bacteraemia | 3 | 20.14  (6.49,62.53) | 20.12  (6.49,62.35) | 4.33  (0.35) | 20.10  (6.47) |
| Haemorrhage | 65 | 18.00  (14.07,23.04) | 17.51  (13.78,22.25) | 4.13  (3.45) | 17.50  (13.67) |
| Shock haemorrhagic | 5 | 17.50  (7.28,42.10) | 17.47  (7.27,41.93) | 4.13  (1.04) | 17.45  (7.26) |
| Procedural complication | 5 | 17.00  (7.07,40.89) | 16.96  (7.06,40.72) | 4.08  (1.03) | 16.95  (7.05) |
| Hepatic function abnormal | 21 | 16.27  (10.58,25.01) | 16.12  (10.53,24.68) | 4.01  (2.64) | 16.11  (10.48) |
| Hemiplegia | 5 | 16.13  (6.71,38.81) | 16.10  (6.70,38.65) | 4.01  (1.01) | 16.09  (6.69) |
| Mouth haemorrhage | 4 | 15.20  (5.70,40.54) | 15.17  (5.70,40.40) | 3.92  (0.69) | 15.16  (5.68) |
| Cerebral haemorrhage | 19 | 14.55  (9.26,22.85) | 14.43  (9.22,22.58) | 3.85  (2.46) | 14.42  (9.18) |
| Necrosis | 3 | 14.48  (4.67,44.95) | 14.46  (4.67,44.83) | 3.85  (0.28) | 14.46  (4.66) |
| Haemorrhagic stroke | 4 | 13.64  (5.11,36.39) | 13.62  (5.11,36.26) | 3.77  (0.66) | 13.61  (5.10) |
| Cardiac failure acute | 3 | 12.85  (4.14,39.90) | 12.84  (4.14,39.79) | 3.68  (0.25) | 12.83  (4.13) |
| Multiple organ dysfunction syndrome | 20 | 12.40  (7.98,19.26) | 12.30  (7.95,19.02) | 3.62  (2.37) | 12.29  (7.91) |
| Haemorrhage intracranial | 7 | 12.26  (5.84,25.76) | 12.23  (5.84,25.63) | 3.61  (1.32) | 12.22  (5.82) |
| Hepatic failure | 13 | 11.76  (6.81,20.28) | 11.69  (6.80,20.11) | 3.55  (1.95) | 11.69  (6.77) |
| Haemodynamic instability | 3 | 11.49  (3.70,35.65) | 11.47  (3.70,35.55) | 3.52  (0.22) | 11.47  (3.69) |
| Blood bilirubin increased | 10 | 9.94  (5.34,18.51) | 9.90  (5.34,18.38) | 3.31  (1.58) | 9.90  (5.32) |
| Gastrointestinal haemorrhage | 31 | 9.80  (6.88,13.98) | 9.68  (6.83,13.74) | 3.27  (2.41) | 9.68  (6.79) |
| Deep vein thrombosis | 24 | 9.78  (6.54,14.62) | 9.69  (6.51,14.42) | 3.28  (2.26) | 9.68  (6.48) |
| Upper gastrointestinal haemorrhage | 6 | 9.53  (4.28,21.25) | 9.51  (4.28,21.15) | 3.25  (1.01) | 9.51  (4.27) |
| Atrial septal defect | 3 | 9.20  (2.97,28.57) | 9.19  (2.97,28.49) | 3.20  (0.15) | 9.19  (2.96) |
| Post procedural haemorrhage | 4 | 9.19  (3.44,24.50) | 9.17  (3.44,24.42) | 3.20  (0.51) | 9.17  (3.44) |
| Ischaemic stroke | 6 | 9.14  (4.10,20.36) | 9.12  (4.10,20.27) | 3.19  (0.98) | 9.11  (4.09) |
| Drug resistance | 8 | 8.88  (4.43,17.78) | 8.85  (4.43,17.68) | 3.15  (1.28) | 8.85  (4.42) |
| Haemodialysis | 3 | 8.82  (2.84,27.36) | 8.81  (2.84,27.29) | 3.14  (0.13) | 8.80  (2.84) |
| Brain oedema | 4 | 8.81  (3.30,23.49) | 8.79  (3.30,23.41) | 3.14  (0.49) | 8.79  (3.30) |
| Thrombosis | 25 | 8.50  (5.73,12.61) | 8.41  (5.70,12.43) | 3.07  (2.14) | 8.41  (5.67) |
| Aspartate aminotransferase increased | 16 | 8.20  (5.02,13.42) | 8.15  (5.00,13.28) | 3.03  (1.82) | 8.15  (4.98) |
| Liver function test abnormal | 9 | 8.08  (4.20,15.55) | 8.05  (4.20,15.46) | 3.01  (1.32) | 8.05  (4.18) |
| Petechiae | 3 | 7.93  (2.56,24.61) | 7.92  (2.56,24.55) | 2.99  (0.09) | 7.92  (2.55) |
| Acute respiratory distress syndrome | 5 | 7.75  (3.22,18.64) | 7.73  (3.22,18.57) | 2.95  (0.69) | 7.73  (3.21) |
| Dialysis | 4 | 7.56  (2.84,20.17) | 7.55  (2.84,20.10) | 2.92  (0.42) | 7.55  (2.83) |
| Blood alkaline phosphatase increased | 7 | 7.41  (3.53,15.56) | 7.39  (3.53,15.48) | 2.89  (1.02) | 7.39  (3.52) |
| Ventricular fibrillation | 3 | 7.29  (2.35,22.64) | 7.29  (2.35,22.58) | 2.86  (0.06) | 7.28  (2.35) |
| Septic shock | 11 | 7.26  (4.01,13.13) | 7.23  (4.01,13.04) | 2.85  (1.41) | 7.23  (4.00) |
| Vasculitis | 3 | 7.15  (2.30,22.19) | 7.14  (2.30,22.13) | 2.84  (0.05) | 7.14  (2.30) |
| Anaphylactic shock | 6 | 6.69  (3.00,14.92) | 6.68  (3.00,14.85) | 2.74  (0.79) | 6.68  (3.00) |
| Ventricular tachycardia | 4 | 6.60  (2.47,17.59) | 6.59  (2.47,17.54) | 2.72  (0.34) | 6.58  (2.47) |
| Thrombocytopenia | 26 | 6.57  (4.46,9.67) | 6.50  (4.44,9.53) | 2.70  (1.87) | 6.50  (4.42) |
| Hepatocellular injury | 4 | 6.32  (2.37,16.85) | 6.31  (2.37,16.79) | 2.66  (0.32) | 6.31  (2.36) |
| Accidental overdose | 8 | 6.26  (3.13,12.54) | 6.25  (3.13,12.47) | 2.64  (1.02) | 6.24  (3.12) |
| Acute myocardial infarction | 7 | 6.23  (2.97,13.08) | 6.21  (2.97,13.02) | 2.64  (0.89) | 6.21  (2.96) |
| Leukocytosis | 4 | 6.15  (2.31,16.40) | 6.14  (2.31,16.34) | 2.62  (0.31) | 6.14  (2.30) |
| Haemoptysis | 6 | 5.85  (2.62,13.03) | 5.83  (2.62,12.97) | 2.54  (0.69) | 5.83  (2.62) |
| Liver disorder | 9 | 5.71  (2.97,10.99) | 5.69  (2.96,10.92) | 2.51  (1.04) | 5.69  (2.96) |
| Rectal haemorrhage | 9 | 5.69  (2.95,10.94) | 5.67  (2.95,10.88) | 2.50  (1.03) | 5.67  (2.94) |
| Rhabdomyolysis | 8 | 5.33  (2.66,10.67) | 5.31  (2.66,10.61) | 2.41  (0.88) | 5.31  (2.65) |
| Alanine aminotransferase increased | 12 | 5.32  (3.02,9.38) | 5.30  (3.01,9.31) | 2.40  (1.19) | 5.30  (3.00) |
| Respiratory failure | 14 | 5.25  (3.10,8.88) | 5.22  (3.10,8.80) | 2.38  (1.28) | 5.22  (3.09) |
| Cardiac arrest | 16 | 5.24  (3.20,8.57) | 5.21  (3.20,8.49) | 2.38  (1.36) | 5.21  (3.18) |
| Pulmonary embolism | 18 | 5.08  (3.19,8.08) | 5.05  (3.19,8.00) | 2.34  (1.39) | 5.05  (3.17) |
| Medication error | 9 | 4.51  (2.34,8.68) | 4.49  (2.34,8.63) | 2.17  (0.82) | 4.49  (2.34) |
| Sepsis | 18 | 4.46  (2.80,7.09) | 4.43  (2.80,7.02) | 2.15  (1.24) | 4.43  (2.78) |
| Epistaxis | 12 | 4.40  (2.50,7.76) | 4.38  (2.49,7.71) | 2.13  (0.99) | 4.38  (2.49) |
| Platelet count decreased | 16 | 4.15  (2.54,6.78) | 4.13  (2.53,6.72) | 2.04  (1.10) | 4.13  (2.52) |

Note1: ranked by ROR

**Supplementary Table S5.** The gender-stratified subgroup with detailed data

| gender | PT | a（Target drug-Target report） | ROR(95% CI) | PRR(95% CI) | IC(IC025) | EBGM(EBGM05) |
| --- | --- | --- | --- | --- | --- | --- |
| Male | Haemorrhage | 36 | 15.59(11.19,21.73) | 15.16(10.98,20.91) | 3.92(2.97) | 15.14(10.87) |
| Male | Activated partial thromboplastin time prolonged | 35 | 243.42(173.48,341.56) | 236.40(170.11,328.51) | 7.86(4.48) | 232.81(165.92) |
| Male | International normalised ratio increased | 34 | 41.59(29.56,58.52) | 40.45(29.03,56.37) | 5.33(3.75) | 40.35(28.68) |
| Male | Coagulation time prolonged | 24 | 655.44(433.96,989.96) | 642.44(428.71,962.72) | 9.27(3.99) | 616.57(408.22) |
| Male | Gastrointestinal haemorrhage | 23 | 9.98(6.61,15.08) | 9.81(6.54,14.71) | 3.29(2.25) | 9.80(6.49) |
| Male | Drug ineffective | 21 | 0.88(0.57,1.36) | 0.88(0.58,1.35) | -0.18(-0.79) | 0.88(0.57) |
| Male | Cerebral infarction | 20 | 30.11(19.35,46.87) | 29.63(19.18,45.78) | 4.89(3.01) | 29.57(19.00) |
| Male | Thrombocytopenia | 19 | 7.05(4.48,11.09) | 6.95(4.45,10.87) | 2.80(1.77) | 6.95(4.42) |
| Male | Off label use | 19 | 1.25(0.80,1.97) | 1.25(0.80,1.95) | 0.32(-0.35) | 1.25(0.79) |
| Male | Coagulopathy | 18 | 43.09(27.04,68.68) | 42.46(26.83,67.21) | 5.40(3.07) | 42.35(26.57) |
| Male | Disseminated intravascular coagulation | 17 | 43.15(26.72,69.69) | 42.55(26.53,68.27) | 5.41(3.00) | 42.44(26.28) |
| Male | Multiple organ dysfunction syndrome | 17 | 13.70(8.49,22.12) | 13.52(8.43,21.69) | 3.76(2.31) | 13.51(8.37) |
| Male | Hepatic function abnormal | 14 | 14.34(8.46,24.29) | 14.19(8.42,23.88) | 3.83(2.17) | 14.17(8.37) |
| Male | Deep vein thrombosis | 13 | 9.50(5.50,16.42) | 9.41(5.48,16.16) | 3.23(1.78) | 9.41(5.44) |
| Male | Heparin-induced thrombocytopenia | 13 | 91.96(53.15,159.10) | 90.98(52.90,156.48) | 6.50(2.84) | 90.45(52.28) |
| Male | Cardiac arrest | 12 | 5.20(2.95,9.19) | 5.16(2.94,9.07) | 2.37(1.16) | 5.16(2.92) |
| Male | Pneumonia | 12 | 1.52(0.86,2.69) | 1.52(0.86,2.67) | 0.60(-0.26) | 1.52(0.86) |
| Male | Sepsis | 12 | 4.24(2.40,7.49) | 4.21(2.40,7.39) | 2.07(0.95) | 4.21(2.38) |
| Male | Thrombosis | 12 | 6.78(3.84,11.97) | 6.72(3.83,11.80) | 2.75(1.42) | 6.72(3.80) |
| Male | Acute kidney injury | 12 | 2.29(1.29,4.04) | 2.27(1.29,3.99) | 1.18(0.24) | 2.27(1.29) |
| Male | Subarachnoid haemorrhage | 11 | 44.94(24.80,81.44) | 44.54(24.71,80.28) | 5.47(2.43) | 44.41(24.51) |
| Male | Anaemia | 9 | 2.13(1.10,4.10) | 2.12(1.11,4.07) | 1.08(0.01) | 2.12(1.10) |
| Male | Cerebral haemorrhage | 9 | 9.36(4.86,18.03) | 9.29(4.85,17.82) | 3.22(1.43) | 9.29(4.82) |
| Male | Hypotension | 9 | 1.86(0.96,3.58) | 1.85(0.97,3.55) | 0.89(-0.15) | 1.85(0.96) |
| Male | Pulmonary embolism | 9 | 4.59(2.38,8.85) | 4.57(2.38,8.76) | 2.19(0.83) | 4.57(2.37) |
| Male | Respiratory failure | 9 | 4.50(2.33,8.67) | 4.47(2.33,8.58) | 2.16(0.81) | 4.47(2.32) |
| Male | Aspartate aminotransferase increased | 8 | 6.14(3.06,12.31) | 6.11(3.06,12.19) | 2.61(1.00) | 6.11(3.05) |
| Male | Condition aggravated | 8 | 1.51(0.75,3.02) | 1.50(0.75,3.00) | 0.59(-0.46) | 1.50(0.75) |
| Male | Hepatic failure | 8 | 10.39(5.18,20.83) | 10.33(5.18,20.61) | 3.37(1.38) | 10.32(5.15) |
| Male | Rhabdomyolysis | 8 | 6.05(3.02,12.13) | 6.02(3.01,12.00) | 2.59(0.98) | 6.01(3.00) |
| Male | Blood bilirubin increased | 7 | 9.14(4.35,19.23) | 9.10(4.34,19.04) | 3.18(1.15) | 9.09(4.32) |
| Male | Epistaxis | 7 | 4.05(1.93,8.52) | 4.04(1.93,8.45) | 2.01(0.52) | 4.04(1.92) |
| Male | Haemorrhagic cerebral infarction | 7 | 336.30(158.70,712.65) | 334.35(158.45,705.52) | 8.35(1.93) | 327.22(154.41) |
| Male | Overdose | 7 | 1.27(0.60,2.66) | 1.27(0.60,2.65) | 0.34(-0.73) | 1.27(0.60) |
| Male | Platelet count decreased | 7 | 2.68(1.28,5.64) | 2.67(1.28,5.59) | 1.42(0.12) | 2.67(1.27) |
| Male | Septic shock | 7 | 6.09(2.90,12.80) | 6.06(2.89,12.68) | 2.60(0.87) | 6.06(2.88) |
| Male | Cardiac ventricular thrombosis | 7 | 61.24(29.09,128.93) | 60.90(29.05,127.65) | 5.92(1.82) | 60.66(28.81) |
| Male | Embolism | 7 | 41.08(19.52,86.45) | 40.85(19.50,85.59) | 5.35(1.75) | 40.75(19.36) |
| Male | Accidental overdose | 6 | 7.20(3.23,16.06) | 7.17(3.23,15.93) | 2.84(0.84) | 7.17(3.21) |
| Male | Anaphylactic shock | 6 | 12.11(5.43,27.02) | 12.06(5.43,26.79) | 3.59(1.13) | 12.05(5.40) |
| Male | Atrial fibrillation | 6 | 2.29(1.03,5.11) | 2.28(1.03,5.07) | 1.19(-0.15) | 2.28(1.02) |
| Male | Cardiogenic shock | 6 | 17.00(7.62,37.93) | 16.92(7.61,37.61) | 4.08(1.27) | 16.90(7.58) |
| Male | Death | 6 | 0.27(0.12,0.60) | 0.27(0.12,0.60) | -1.88(-2.82) | 0.27(0.12) |
| Male | Liver disorder | 6 | 6.16(2.76,13.74) | 6.13(2.76,13.62) | 2.62(0.73) | 6.13(2.75) |
| Male | Neutropenia | 6 | 2.18(0.98,4.86) | 2.17(0.98,4.83) | 1.12(-0.20) | 2.17(0.97) |
| Male | Skin discolouration | 6 | 7.56(3.39,16.86) | 7.52(3.39,16.72) | 2.91(0.87) | 7.52(3.37) |
| Male | Renal impairment | 6 | 2.76(1.24,6.16) | 2.75(1.24,6.11) | 1.46(0.04) | 2.75(1.23) |
| Male | Vascular stent thrombosis | 6 | 89.48(40.02,200.03) | 89.04(39.99,198.26) | 6.47(1.62) | 88.53(39.60) |
| Male | Acute myocardial infarction | 5 | 4.78(1.99,11.51) | 4.77(1.99,11.43) | 2.25(0.37) | 4.77(1.98) |
| Male | Alanine aminotransferase increased | 5 | 3.31(1.37,7.96) | 3.30(1.38,7.91) | 1.72(0.07) | 3.30(1.37) |
| Male | Blood pressure decreased | 5 | 3.25(1.35,7.83) | 3.24(1.35,7.78) | 1.70(0.06) | 3.24(1.35) |
| Male | Cardio-respiratory arrest | 5 | 4.31(1.79,10.38) | 4.30(1.79,10.31) | 2.10(0.29) | 4.30(1.79) |
| Male | Haemoglobin decreased | 5 | 1.98(0.82,4.77) | 1.98(0.82,4.74) | 0.98(-0.42) | 1.98(0.82) |
| Male | Haemoptysis | 5 | 6.08(2.52,14.63) | 6.05(2.52,14.52) | 2.60(0.53) | 6.05(2.51) |
| Male | Liver function test abnormal | 5 | 7.58(3.15,18.26) | 7.56(3.15,18.13) | 2.92(0.67) | 7.55(3.14) |
| Male | Pulmonary haemorrhage | 5 | 22.01(9.14,53.01) | 21.92(9.14,52.61) | 4.45(1.11) | 21.89(9.09) |
| Male | Rectal haemorrhage | 5 | 4.72(1.96,11.35) | 4.70(1.96,11.28) | 2.23(0.36) | 4.70(1.95) |
| Male | Renal failure | 5 | 1.32(0.55,3.18) | 1.32(0.55,3.17) | 0.40(-0.85) | 1.32(0.55) |
| Male | Activated partial thromboplastin time shortened | 4 | 342.69(127.02,924.56) | 341.56(127.01,918.55) | 8.38(0.99) | 334.11(123.84) |
| Male | Acute respiratory distress syndrome | 4 | 8.34(3.13,22.27) | 8.32(3.13,22.14) | 3.06(0.46) | 8.32(3.11) |
| Male | Coagulation factor V level decreased | 4 | 475.52(175.51,1288.30) | 473.94(175.50,1279.94) | 8.84(0.99) | 459.72(169.68) |
| Male | Depressed level of consciousness | 4 | 4.19(1.57,11.18) | 4.18(1.57,11.12) | 2.06(0.06) | 4.18(1.57) |
| Male | Fibrin D dimer increased | 4 | 53.48(20.00,142.96) | 53.30(20.00,142.04) | 5.73(0.92) | 53.12(19.87) |
| Male | Haemorrhage intracranial | 4 | 9.79(3.67,26.13) | 9.76(3.67,25.97) | 3.29(0.53) | 9.75(3.65) |
| Male | Hepatocellular injury | 4 | 9.65(3.61,25.75) | 9.62(3.61,25.59) | 3.26(0.53) | 9.61(3.60) |
| Male | Intestinal ischaemia | 4 | 29.95(11.21,80.00) | 29.85(11.21,79.49) | 4.90(0.85) | 29.80(11.15) |
| Male | Leukocytosis | 4 | 8.44(3.16,22.53) | 8.41(3.16,22.39) | 3.07(0.47) | 8.41(3.15) |
| Male | Leukopenia | 4 | 3.74(1.40,9.99) | 3.73(1.40,9.94) | 1.90(-0.02) | 3.73(1.40) |
| Male | Prothrombin time prolonged | 4 | 22.92(8.58,61.21) | 22.85(8.58,60.82) | 4.51(0.79) | 22.81(8.54) |
| Male | Prothrombin time ratio decreased | 4 | 280.10(104.02,754.20) | 279.17(104.01,749.29) | 8.10(0.99) | 274.18(101.83) |
| Male | Pulmonary alveolar haemorrhage | 4 | 25.29(9.47,67.55) | 25.21(9.47,67.12) | 4.65(0.81) | 25.17(9.42) |
| Male | Rash | 4 | 0.48(0.18,1.27) | 0.48(0.18,1.28) | -1.06(-2.20) | 0.48(0.18) |
| Male | Brain oedema | 4 | 12.69(4.75,33.89) | 12.65(4.75,33.67) | 3.66(0.63) | 12.64(4.74) |
| Male | Bronchial haemorrhage | 4 | 464.71(171.58,1258.59) | 463.17(171.57,1250.42) | 8.81(0.99) | 449.58(166.00) |
| Male | Toxicity to various agents | 4 | 1.02(0.38,2.71) | 1.02(0.38,2.70) | 0.02(-1.28) | 1.02(0.38) |
| Male | Activated partial thromboplastin time abnormal | 3 | 469.06(148.49,1481.66) | 467.90(148.54,1473.90) | 8.83(0.52) | 454.03(143.74) |
| Male | Atrial septal defect | 3 | 14.53(4.68,45.14) | 14.50(4.68,44.91) | 3.86(0.28) | 14.48(4.66) |
| Male | Blister | 3 | 3.09(1.00,9.61) | 3.09(1.00,9.56) | 1.63(-0.43) | 3.09(0.99) |
| Male | Bradycardia | 3 | 2.12(0.68,6.57) | 2.11(0.68,6.55) | 1.08(-0.72) | 2.11(0.68) |
| Male | Cardiac failure | 3 | 1.42(0.46,4.40) | 1.42(0.46,4.39) | 0.50(-1.09) | 1.42(0.46) |
| Male | Chest pain | 3 | 0.78(0.25,2.43) | 0.78(0.25,2.43) | -0.35(-1.72) | 0.78(0.25) |
| Male | Coagulation time abnormal | 3 | 399.72(126.86,1259.45) | 398.73(126.90,1252.84) | 8.60(0.52) | 388.62(123.34) |
| Male | Dyspnoea | 3 | 0.27(0.09,0.83) | 0.27(0.09,0.83) | -1.90(-3.06) | 0.27(0.09) |
| Male | Haematochezia | 3 | 2.27(0.73,7.03) | 2.26(0.73,7.00) | 1.18(-0.66) | 2.26(0.73) |
| Male | Haemodialysis | 3 | 10.71(3.45,33.25) | 10.68(3.45,33.08) | 3.42(0.20) | 10.67(3.44) |
| Male | Intraventricular haemorrhage | 3 | 40.97(13.17,127.40) | 40.87(13.18,126.73) | 5.35(0.45) | 40.76(13.11) |
| Male | Loss of consciousness | 3 | 1.03(0.33,3.21) | 1.03(0.33,3.20) | 0.05(-1.41) | 1.03(0.33) |
| Male | Medication error | 3 | 2.92(0.94,9.08) | 2.92(0.94,9.04) | 1.54(-0.47) | 2.92(0.94) |
| Male | Melaena | 3 | 4.49(1.45,13.94) | 4.48(1.45,13.88) | 2.16(-0.19) | 4.48(1.44) |
| Male | Mouth haemorrhage | 3 | 16.21(5.22,50.35) | 16.17(5.22,50.09) | 4.01(0.31) | 16.15(5.20) |
| Male | Necrosis | 3 | 21.58(6.94,67.06) | 21.53(6.95,66.71) | 4.43(0.36) | 21.50(6.92) |
| Male | Peripheral ischaemia | 3 | 26.30(8.46,81.73) | 26.23(8.46,81.30) | 4.71(0.40) | 26.19(8.43) |
| Male | Pneumonia aspiration | 3 | 3.83(1.23,11.89) | 3.82(1.23,11.84) | 1.93(-0.28) | 3.82(1.23) |
| Male | Prothrombin time shortened | 3 | 84.34(27.08,262.70) | 84.14(27.09,261.32) | 6.39(0.50) | 83.68(26.87) |
| Male | Pulmonary oedema | 3 | 2.65(0.85,8.22) | 2.64(0.85,8.19) | 1.40(-0.54) | 2.64(0.85) |
| Male | Pyrexia | 3 | 0.38(0.12,1.18) | 0.38(0.12,1.18) | -1.39(-2.59) | 0.38(0.12) |
| Male | Skin necrosis | 3 | 26.97(8.68,83.84) | 26.91(8.68,83.40) | 4.75(0.40) | 26.86(8.64) |
| Male | Upper gastrointestinal haemorrhage | 3 | 5.55(1.79,17.25) | 5.54(1.79,17.17) | 2.47(-0.07) | 5.54(1.78) |
| Male | Urticaria | 3 | 1.23(0.40,3.83) | 1.23(0.40,3.82) | 0.30(-1.23) | 1.23(0.40) |
| Male | Ventricular fibrillation | 3 | 9.03(2.91,28.04) | 9.01(2.91,27.90) | 3.17(0.14) | 9.00(2.90) |
| Male | Vascular pseudoaneurysm | 3 | 59.62(19.16,185.52) | 59.47(19.17,184.55) | 5.89(0.48) | 59.25(19.04) |
| Male | Post procedural haemorrhage | 3 | 12.17(3.92,37.80) | 12.14(3.92,37.61) | 3.60(0.24) | 12.13(3.91) |
| Male | Catheter site haemorrhage | 3 | 54.40(17.48,169.24) | 54.27(17.49,168.36) | 5.76(0.47) | 54.08(17.38) |
| Male | Post procedural complication | 3 | 7.13(2.30,22.14) | 7.11(2.30,22.03) | 2.83(0.05) | 7.11(2.29) |
| Male | Pulseless electrical activity | 3 | 22.04(7.09,68.50) | 21.99(7.10,68.15) | 4.46(0.37) | 21.96(7.07) |
| Male | Dialysis | 3 | 7.59(2.44,23.57) | 7.57(2.45,23.45) | 2.92(0.07) | 7.57(2.44) |
| Male | Venous thrombosis limb | 3 | 59.54(19.13,185.28) | 59.40(19.14,184.31) | 5.89(0.48) | 59.17(19.01) |
| Male | Disease progression | 3 | 1.11(0.36,3.44) | 1.11(0.36,3.43) | 0.15(-1.34) | 1.11(0.36) |
| Male | Hypoxic-ischaemic encephalopathy | 3 | 27.69(8.91,86.06) | 27.62(8.91,85.62) | 4.79(0.40) | 27.57(8.87) |
| Male | Product use in unapproved indication | 3 | 0.72(0.23,2.23) | 0.72(0.23,2.22) | -0.48(-1.82) | 0.72(0.23) |
| Female | International normalised ratio increased | 38 | 122.65(88.51,169.96) | 116.92(85.68,159.55) | 6.86(4.40) | 116.56(84.12) |
| Female | Activated partial thromboplastin time prolonged | 33 | 633.23(445.76,899.54) | 607.34(433.63,850.64) | 9.22(4.50) | 597.82(420.83) |
| Female | Coagulation time prolonged | 33 | 2034.48(1423.88,2906.93) | 1951.22(1384.74,2749.45) | 10.86(4.54) | 1856.16(1299.08) |
| Female | Drug ineffective | 21 | 1.28(0.83,1.97) | 1.27(0.83,1.94) | 0.34(-0.30) | 1.27(0.82) |
| Female | Haemorrhage | 15 | 14.32(8.59,23.87) | 14.08(8.52,23.24) | 3.81(2.22) | 14.07(8.44) |
| Female | Heparin-induced thrombocytopenia | 14 | 314.85(185.22,535.21) | 309.40(183.69,521.15) | 8.26(3.09) | 306.92(180.55) |
| Female | Thrombosis | 12 | 11.77(6.66,20.82) | 11.61(6.62,20.36) | 3.54(1.87) | 11.61(6.56) |
| Female | Cerebral infarction | 9 | 38.11(19.75,73.53) | 37.69(19.68,72.20) | 5.23(2.09) | 37.66(19.51) |
| Female | Platelet count decreased | 9 | 7.79(4.04,15.03) | 7.72(4.03,14.78) | 2.95(1.29) | 7.72(4.00) |
| Female | Deep vein thrombosis | 9 | 10.22(5.30,19.72) | 10.12(5.28,19.38) | 3.34(1.48) | 10.12(5.24) |
| Female | Off label use | 9 | 0.96(0.50,1.86) | 0.96(0.50,1.84) | -0.05(-0.97) | 0.96(0.50) |
| Female | Cerebral haemorrhage | 8 | 22.84(11.38,45.85) | 22.63(11.35,45.10) | 4.50(1.76) | 22.61(11.27) |
| Female | Gastrointestinal haemorrhage | 8 | 9.42(4.70,18.91) | 9.34(4.69,18.61) | 3.22(1.31) | 9.34(4.65) |
| Female | Prothrombin time prolonged | 8 | 111.96(55.74,224.87) | 110.85(55.57,221.13) | 6.79(2.10) | 110.54(55.03) |
| Female | Hypofibrinogenaemia | 8 | 1220.95(601.90,2476.68) | 1208.84(600.00,2435.48) | 10.19(2.18) | 1171.67(577.61) |
| Female | Aspartate aminotransferase increased | 7 | 11.25(5.34,23.67) | 11.16(5.34,23.33) | 3.48(1.27) | 11.15(5.30) |
| Female | Death | 7 | 0.89(0.43,1.88) | 0.90(0.43,1.87) | -0.16(-1.17) | 0.90(0.43) |
| Female | Hypotension | 7 | 3.02(1.44,6.36) | 3.01(1.44,6.28) | 1.59(0.24) | 3.01(1.43) |
| Female | Thrombocytopenia | 7 | 6.72(3.19,14.14) | 6.67(3.19,13.95) | 2.74(0.94) | 6.67(3.17) |
| Female | Anaphylactic reaction | 6 | 8.90(3.98,19.86) | 8.84(3.98,19.61) | 3.14(0.96) | 8.83(3.96) |
| Female | Haemoglobin decreased | 6 | 4.99(2.24,11.15) | 4.96(2.24,11.01) | 2.31(0.57) | 4.96(2.22) |
| Female | Hepatic function abnormal | 6 | 17.04(7.63,38.05) | 16.92(7.62,37.56) | 4.08(1.27) | 16.91(7.57) |
| Female | Pulmonary embolism | 6 | 4.64(2.08,10.36) | 4.61(2.08,10.24) | 2.21(0.51) | 4.61(2.07) |
| Female | Drug resistance | 6 | 28.10(12.58,62.75) | 27.90(12.57,61.93) | 4.80(1.43) | 27.88(12.48) |
| Female | Thrombosis in device | 6 | 196.90(88.01,440.49) | 195.44(87.88,434.63) | 7.60(1.66) | 194.45(86.92) |
| Female | Activated partial thromboplastin time abnormal | 5 | 2060.00(835.48,5079.23) | 2047.23(834.72,5020.99) | 10.92(1.36) | 1942.83(787.96) |
| Female | Alanine aminotransferase increased | 5 | 7.07(2.94,17.04) | 7.04(2.94,16.86) | 2.81(0.63) | 7.03(2.92) |
| Female | Bleeding time prolonged | 5 | 380.11(157.10,919.72) | 377.76(156.98,909.08) | 8.55(1.38) | 374.06(154.60) |
| Female | Haemorrhagic cerebral infarction | 5 | 689.13(283.82,1673.26) | 684.86(283.59,1653.93) | 9.39(1.38) | 672.78(277.09) |
| Female | Hepatic failure | 5 | 15.77(6.55,38.00) | 15.68(6.54,37.57) | 3.97(1.00) | 15.67(6.50) |
| Female | Respiratory failure | 5 | 6.55(2.72,15.77) | 6.51(2.72,15.60) | 2.70(0.58) | 6.51(2.70) |
| Female | Subarachnoid haemorrhage | 5 | 41.65(17.28,100.39) | 41.40(17.27,99.24) | 5.37(1.24) | 41.35(17.16) |
| Female | Therapeutic response decreased | 5 | 6.93(2.87,16.69) | 6.89(2.87,16.51) | 2.78(0.61) | 6.89(2.86) |
| Female | Blood alkaline phosphatase increased | 5 | 15.68(6.51,37.79) | 15.59(6.51,37.36) | 3.96(1.00) | 15.58(6.47) |
| Female | Hepatic enzyme increased | 5 | 5.73(2.38,13.80) | 5.70(2.38,13.65) | 2.51(0.49) | 5.70(2.36) |
| Female | Maternal exposure during pregnancy | 5 | 3.03(1.26,7.30) | 3.02(1.26,7.23) | 1.59(-0.01) | 3.02(1.25) |
| Female | Activated partial thromboplastin time shortened | 4 | 889.96(329.45,2404.06) | 885.55(329.40,2380.64) | 9.76(1.00) | 865.44(320.38) |
| Female | Anaemia | 4 | 1.74(0.65,4.65) | 1.74(0.65,4.62) | 0.80(-0.70) | 1.74(0.65) |
| Female | Cardiac arrest | 4 | 4.67(1.75,12.48) | 4.65(1.75,12.37) | 2.22(0.13) | 4.65(1.74) |
| Female | Chest discomfort | 4 | 2.70(1.01,7.20) | 2.69(1.01,7.15) | 1.43(-0.29) | 2.69(1.01) |
| Female | Coagulopathy | 4 | 20.66(7.73,55.20) | 20.56(7.73,54.67) | 4.36(0.77) | 20.55(7.69) |
| Female | Disseminated intravascular coagulation | 4 | 26.74(10.01,71.45) | 26.61(10.01,70.76) | 4.73(0.82) | 26.60(9.95) |
| Female | Drug interaction | 4 | 2.31(0.86,6.16) | 2.30(0.87,6.11) | 1.20(-0.43) | 2.30(0.86) |
| Female | Dyspnoea | 4 | 0.52(0.19,1.39) | 0.52(0.20,1.39) | -0.94(-2.09) | 0.52(0.20) |
| Female | Gangrene | 4 | 72.17(26.99,192.93) | 71.81(26.99,191.05) | 6.16(0.95) | 71.68(26.81) |
| Female | Haemorrhagic stroke | 4 | 49.23(18.42,131.58) | 48.99(18.42,130.30) | 5.61(0.91) | 48.93(18.31) |
| Female | Overdose | 4 | 1.72(0.64,4.60) | 1.72(0.65,4.57) | 0.78(-0.71) | 1.72(0.64) |
| Female | Pulmonary alveolar haemorrhage | 4 | 90.95(34.01,243.20) | 90.50(34.01,240.83) | 6.50(0.96) | 90.29(33.76) |
| Female | Rectal haemorrhage | 4 | 7.86(2.94,21.00) | 7.83(2.94,20.81) | 2.97(0.43) | 7.83(2.93) |
| Female | Sepsis | 4 | 3.46(1.29,9.23) | 3.44(1.30,9.15) | 1.78(-0.09) | 3.44(1.29) |
| Female | Septic shock | 4 | 9.77(3.66,26.09) | 9.72(3.66,25.85) | 3.28(0.53) | 9.72(3.64) |
| Female | Shock haemorrhagic | 4 | 51.85(19.40,138.58) | 51.60(19.40,137.23) | 5.69(0.92) | 51.53(19.28) |
| Female | Acute kidney injury | 4 | 2.21(0.83,5.90) | 2.20(0.83,5.86) | 1.14(-0.47) | 2.20(0.83) |
| Female | Aortic thrombosis | 3 | 246.58(79.07,768.97) | 245.67(79.11,762.90) | 7.93(0.53) | 244.10(78.27) |
| Female | Blood bilirubin increased | 3 | 11.00(3.54,34.19) | 10.96(3.54,33.93) | 3.45(0.20) | 10.96(3.53) |
| Female | Cardiac failure | 3 | 3.61(1.16,11.21) | 3.60(1.16,11.13) | 1.85(-0.32) | 3.60(1.16) |
| Female | Cardiac tamponade | 3 | 68.82(22.13,214.06) | 68.57(22.14,212.38) | 6.10(0.49) | 68.45(22.01) |
| Female | Cerebrovascular accident | 3 | 1.48(0.48,4.59) | 1.47(0.48,4.56) | 0.56(-1.05) | 1.47(0.47) |
| Female | Coagulation time abnormal | 3 | 1333.28(420.79,4224.45) | 1328.32(420.97,4191.32) | 10.33(0.52) | 1283.58(405.11) |
| Female | Epistaxis | 3 | 3.33(1.07,10.34) | 3.32(1.07,10.27) | 1.73(-0.38) | 3.32(1.07) |
| Female | Gamma-glutamyltransferase increased | 3 | 11.19(3.60,34.77) | 11.15(3.60,34.51) | 3.48(0.21) | 11.15(3.59) |
| Female | Haematochezia | 3 | 4.87(1.57,15.13) | 4.85(1.57,15.02) | 2.28(-0.14) | 4.85(1.56) |
| Female | Haemorrhage intracranial | 3 | 23.26(7.48,72.29) | 23.18(7.49,71.73) | 4.53(0.38) | 23.16(7.45) |
| Female | Haemorrhagic infarction | 3 | 651.49(207.67,2043.79) | 649.06(207.77,2027.69) | 9.32(0.53) | 638.20(203.44) |
| Female | International normalised ratio decreased | 3 | 62.01(19.94,192.85) | 61.78(19.95,191.34) | 5.95(0.48) | 61.68(19.83) |
| Female | Ischaemic hepatitis | 3 | 204.39(65.58,636.98) | 203.63(65.61,631.96) | 7.66(0.53) | 202.55(64.99) |
| Female | Liver function test abnormal | 3 | 7.96(2.56,24.73) | 7.93(2.56,24.55) | 2.99(0.09) | 7.93(2.55) |
| Female | Medication error | 3 | 4.83(1.56,15.02) | 4.82(1.56,14.91) | 2.27(-0.15) | 4.82(1.55) |
| Female | Paralysis | 3 | 15.23(4.90,47.33) | 15.18(4.90,46.97) | 3.92(0.29) | 15.17(4.88) |
| Female | Premature baby | 3 | 13.32(4.28,41.38) | 13.27(4.29,41.06) | 3.73(0.26) | 13.27(4.27) |
| Female | Pruritus | 3 | 0.55(0.18,1.72) | 0.56(0.18,1.72) | -0.85(-2.12) | 0.56(0.18) |
| Female | Pyrexia | 3 | 0.70(0.23,2.18) | 0.70(0.23,2.17) | -0.51(-1.85) | 0.70(0.23) |
| Female | Rash | 3 | 0.49(0.16,1.53) | 0.50(0.16,1.53) | -1.01(-2.27) | 0.50(0.16) |
| Female | Skin necrosis | 3 | 45.66(14.69,141.97) | 45.49(14.69,140.86) | 5.51(0.46) | 45.44(14.61) |
| Female | Syncope | 3 | 2.30(0.74,7.14) | 2.29(0.74,7.10) | 1.20(-0.65) | 2.29(0.74) |
| Female | Upper gastrointestinal haemorrhage | 3 | 19.15(6.16,59.51) | 19.08(6.16,59.05) | 4.25(0.34) | 19.07(6.14) |
| Female | Ischaemic stroke | 3 | 15.69(5.05,48.76) | 15.64(5.05,48.39) | 3.97(0.30) | 15.63(5.03) |
| Female | Accidental exposure to product | 3 | 2.34(0.75,7.26) | 2.33(0.75,7.21) | 1.22(-0.64) | 2.33(0.75) |

**Supplementary Table S6.** The age-stratified subgroup with detailed data

| **age** | **PT** | **a（Target drug-Target report）** | **ROR(95% CI)** | **PRR(95% CI)** | **IC(IC025)** | **EBGM(EBGM05)** |
| --- | --- | --- | --- | --- | --- | --- |
| <18 | Anaphylactic shock | 4 | 133.67(48.47,368.67) | 125.25(48.42,323.97) | 6.96(0.93) | 124.77(45.24) |
| <18 | Disseminated intravascular coagulation | 4 | 124.23(45.05,342.59) | 116.41(45.01,301.06) | 6.86(0.93) | 115.99(42.06) |
| <18 | Subarachnoid haemorrhage | 3 | 637.03(197.73,2052.35) | 606.74(198.92,1850.71) | 9.22(0.49) | 595.52(184.85) |
| 18-44 | Activated partial thromboplastin time prolonged | 13 | 556.62(317.74,975.08) | 534.12(311.75,915.08) | 9.03(2.98) | 522.92(298.50) |
| 18-44 | Haemorrhage | 10 | 20.23(10.78,37.98) | 19.63(10.66,36.14) | 4.29(1.98) | 19.62(10.45) |
| 18-44 | Drug ineffective | 9 | 1.70(0.88,3.30) | 1.68(0.88,3.20) | 0.75(-0.28) | 1.68(0.87) |
| 18-44 | Hypofibrinogenaemia | 8 | 1634.17(792.79,3368.50) | 1593.47(786.27,3229.38) | 10.55(2.16) | 1497.68(726.58) |
| 18-44 | Heparin-induced thrombocytopenia | 8 | 439.28(216.48,891.36) | 428.35(214.79,854.26) | 8.72(2.16) | 421.12(207.54) |
| 18-44 | International normalised ratio increased | 7 | 94.65(44.69,200.45) | 92.61(44.45,192.95) | 6.53(1.86) | 92.27(43.57) |
| 18-44 | Thrombosis | 6 | 19.93(8.88,44.71) | 19.57(8.86,43.26) | 4.29(1.32) | 19.56(8.72) |
| 18-44 | Anaphylactic reaction | 5 | 13.80(5.70,33.40) | 13.60(5.70,32.47) | 3.77(0.94) | 13.60(5.62) |
| 18-44 | Hepatic function abnormal | 4 | 22.20(8.28,59.53) | 21.93(8.28,58.10) | 4.45(0.78) | 21.91(8.17) |
| 18-44 | Pulmonary alveolar haemorrhage | 4 | 124.80(46.44,335.39) | 123.26(46.43,327.21) | 6.94(0.97) | 122.66(45.64) |
| 18-44 | Off label use | 4 | 1.07(0.40,2.86) | 1.07(0.40,2.82) | 0.09(-1.23) | 1.07(0.40) |
| 18-44 | Cardiac arrest | 3 | 4.87(1.56,15.18) | 4.83(1.57,14.91) | 2.27(-0.15) | 4.83(1.55) |
| 18-44 | Cardiogenic shock | 3 | 32.83(10.52,102.41) | 32.53(10.54,100.41) | 5.02(0.42) | 32.49(10.42) |
| 18-44 | Cerebral haemorrhage | 3 | 35.69(11.44,111.34) | 35.37(11.46,109.17) | 5.14(0.43) | 35.32(11.32) |
| 18-44 | Cerebral infarction | 3 | 41.62(13.34,129.87) | 41.24(13.36,127.33) | 5.36(0.44) | 41.18(13.20) |
| 18-44 | Cerebrovascular accident | 3 | 8.86(2.84,27.61) | 8.78(2.85,27.10) | 3.13(0.12) | 8.78(2.82) |
| 18-44 | Disseminated intravascular coagulation | 3 | 35.96(11.53,112.19) | 35.64(11.54,110.00) | 5.15(0.43) | 35.59(11.41) |
| 18-44 | Dyspnoea | 3 | 1.21(0.39,3.77) | 1.21(0.39,3.72) | 0.27(-1.26) | 1.21(0.39) |
| 18-44 | Epistaxis | 3 | 12.12(3.89,37.78) | 12.01(3.89,37.06) | 3.59(0.23) | 12.01(3.85) |
| 18-44 | Haemoptysis | 3 | 21.35(6.85,66.58) | 21.16(6.86,65.29) | 4.40(0.36) | 21.14(6.78) |
| 18-44 | Hypotension | 3 | 3.43(1.10,10.69) | 3.41(1.10,10.51) | 1.77(-0.36) | 3.41(1.09) |
| 18-44 | Hypoxia | 3 | 18.58(5.96,57.96) | 18.42(5.97,56.84) | 4.20(0.33) | 18.41(5.90) |
| 18-44 | Prothrombin time prolonged | 3 | 91.94(29.43,287.19) | 91.09(29.47,281.53) | 6.50(0.50) | 90.76(29.06) |
| 18-44 | Respiratory failure | 3 | 10.24(3.28,31.92) | 10.15(3.29,31.32) | 3.34(0.17) | 10.15(3.26) |
| 18-44 | Sepsis | 3 | 7.59(2.44,23.67) | 7.53(2.44,23.23) | 2.91(0.06) | 7.53(2.41) |
| 18-44 | Pulseless electrical activity | 3 | 82.39(26.38,257.31) | 81.63(26.42,252.24) | 6.35(0.49) | 81.37(26.06) |
| 18-44 | Maternal exposure during pregnancy | 3 | 2.28(0.73,7.09) | 2.26(0.73,6.98) | 1.18(-0.67) | 2.26(0.73) |
| 18-44 | Multiple organ dysfunction syndrome | 3 | 13.23(4.24,41.27) | 13.12(4.25,40.48) | 3.71(0.25) | 13.11(4.21) |
| 45-64 | Drug ineffective | 20 | 1.94(1.25,3.04) | 1.91(1.24,2.95) | 0.94(0.23) | 1.91(1.23) |
| 45-64 | Activated partial thromboplastin time prolonged | 19 | 414.93(261.69,657.89) | 402.32(257.26,629.18) | 8.62(3.59) | 394.67(248.92) |
| 45-64 | International normalised ratio increased | 18 | 74.92(46.85,119.83) | 72.79(46.13,114.86) | 6.18(3.25) | 72.54(45.36) |
| 45-64 | Haemorrhage | 17 | 24.19(14.94,39.18) | 23.56(14.74,37.66) | 4.56(2.69) | 23.53(14.53) |
| 45-64 | Thrombocytopenia | 16 | 13.83(8.42,22.72) | 13.50(8.32,21.90) | 3.75(2.25) | 13.49(8.21) |
| 45-64 | Deep vein thrombosis | 14 | 20.84(12.26,35.40) | 20.39(12.15,34.24) | 4.35(2.40) | 20.37(11.99) |
| 45-64 | Heparin-induced thrombocytopenia | 14 | 215.83(126.73,367.58) | 211.01(125.37,355.14) | 7.71(3.06) | 208.89(122.65) |
| 45-64 | Coagulation time prolonged | 13 | 951.35(542.70,1667.71) | 931.55(537.39,1614.82) | 9.80(2.99) | 891.49(508.55) |
| 45-64 | Thrombosis | 13 | 17.14(9.89,29.69) | 16.80(9.81,28.77) | 4.07(2.20) | 16.79(9.69) |
| 45-64 | Coagulopathy | 12 | 77.44(43.69,137.26) | 75.97(43.34,133.19) | 6.24(2.68) | 75.70(42.71) |
| 45-64 | Off label use | 12 | 1.83(1.04,3.25) | 1.82(1.04,3.18) | 0.86(-0.04) | 1.82(1.03) |
| 45-64 | Pulmonary embolism | 11 | 11.11(6.12,20.18) | 10.93(6.09,19.64) | 3.45(1.74) | 10.93(6.02) |
| 45-64 | Gastrointestinal haemorrhage | 8 | 11.41(5.68,22.93) | 11.28(5.66,22.46) | 3.49(1.43) | 11.27(5.61) |
| 45-64 | Disseminated intravascular coagulation | 7 | 47.48(22.52,100.10) | 46.96(22.46,98.18) | 5.55(1.77) | 46.86(22.23) |
| 45-64 | Haemoglobin decreased | 6 | 5.70(2.55,12.73) | 5.65(2.55,12.53) | 2.50(0.67) | 5.65(2.53) |
| 45-64 | Hypotension | 6 | 2.82(1.26,6.31) | 2.80(1.26,6.22) | 1.49(0.06) | 2.80(1.26) |
| 45-64 | Cardiac ventricular thrombosis | 6 | 123.72(55.24,277.11) | 122.54(55.13,272.36) | 6.93(1.64) | 121.82(54.39) |
| 45-64 | Vascular stent thrombosis | 6 | 217.05(96.73,487.01) | 214.97(96.55,478.66) | 7.73(1.66) | 212.77(94.83) |
| 45-64 | Acute kidney injury | 6 | 2.74(1.22,6.11) | 2.72(1.23,6.03) | 1.44(0.03) | 2.72(1.22) |
| 45-64 | Multiple organ dysfunction syndrome | 6 | 12.02(5.38,26.86) | 11.91(5.37,26.42) | 3.57(1.12) | 11.91(5.33) |
| 45-64 | Activated partial thromboplastin time abnormal | 5 | 2982.32(1164.55,7637.48) | 2958.43(1162.87,7526.49) | 11.34(1.32) | 2588.76(1010.87) |
| 45-64 | Acute myocardial infarction | 5 | 11.08(4.59,26.72) | 11.00(4.59,26.34) | 3.46(0.86) | 10.99(4.56) |
| 45-64 | Aspartate aminotransferase increased | 5 | 7.40(3.07,17.85) | 7.35(3.07,17.60) | 2.88(0.65) | 7.35(3.05) |
| 45-64 | Cardiac arrest | 5 | 5.07(2.10,12.23) | 5.04(2.10,12.06) | 2.33(0.41) | 5.04(2.09) |
| 45-64 | Cerebral infarction | 5 | 21.89(9.08,52.81) | 21.73(9.07,52.04) | 4.44(1.10) | 21.70(9.00) |
| 45-64 | Hepatic function abnormal | 5 | 11.99(4.97,28.92) | 11.90(4.97,28.51) | 3.57(0.89) | 11.90(4.93) |
| 45-64 | Rhabdomyolysis | 5 | 11.16(4.63,26.92) | 11.08(4.63,26.53) | 3.47(0.86) | 11.07(4.59) |
| 45-64 | Skin necrosis | 5 | 72.33(29.95,174.65) | 71.76(29.93,172.06) | 6.16(1.30) | 71.51(29.62) |
| 45-64 | Blood bilirubin increased | 4 | 11.89(4.45,31.80) | 11.82(4.45,31.41) | 3.56(0.60) | 11.82(4.42) |
| 45-64 | Dyspnoea | 4 | 0.65(0.24,1.73) | 0.65(0.24,1.72) | -0.63(-1.82) | 0.65(0.24) |
| 45-64 | Leukocytosis | 4 | 18.48(6.91,49.40) | 18.36(6.91,48.80) | 4.20(0.74) | 18.35(6.86) |
| 45-64 | Nausea | 4 | 0.43(0.16,1.15) | 0.43(0.16,1.15) | -1.21(-2.33) | 0.43(0.16) |
| 45-64 | Platelet count decreased | 4 | 3.64(1.36,9.72) | 3.62(1.36,9.62) | 1.86(-0.05) | 3.62(1.35) |
| 45-64 | Pneumonia | 4 | 1.16(0.43,3.10) | 1.16(0.44,3.08) | 0.21(-1.13) | 1.16(0.43) |
| 45-64 | Renal failure | 4 | 2.63(0.98,7.02) | 2.62(0.98,6.95) | 1.39(-0.31) | 2.62(0.98) |
| 45-64 | Septic shock | 4 | 7.82(2.92,20.90) | 7.77(2.93,20.65) | 2.96(0.43) | 7.77(2.91) |
| 45-64 | Drug resistance | 4 | 16.36(6.12,43.75) | 16.26(6.12,43.22) | 4.02(0.71) | 16.25(6.08) |
| 45-64 | Activated partial thromboplastin time shortened | 3 | 600.26(189.97,1896.68) | 597.38(190.08,1877.46) | 9.18(0.52) | 580.66(183.76) |
| 45-64 | Alanine aminotransferase increased | 3 | 3.83(1.23,11.90) | 3.81(1.23,11.79) | 1.93(-0.29) | 3.81(1.23) |
| 45-64 | Blister | 3 | 4.97(1.60,15.45) | 4.95(1.60,15.31) | 2.31(-0.13) | 4.95(1.59) |
| 45-64 | Cardiogenic shock | 3 | 18.90(6.08,58.80) | 18.82(6.08,58.21) | 4.23(0.34) | 18.80(6.04) |
| 45-64 | Chest discomfort | 3 | 2.35(0.76,7.31) | 2.35(0.76,7.25) | 1.23(-0.64) | 2.35(0.75) |
| 45-64 | Chest pain | 3 | 1.23(0.40,3.82) | 1.23(0.40,3.80) | 0.30(-1.23) | 1.23(0.39) |
| 45-64 | Condition aggravated | 3 | 1.01(0.32,3.13) | 1.01(0.33,3.11) | 0.01(-1.44) | 1.01(0.32) |
| 45-64 | Gangrene | 3 | 31.64(10.17,98.44) | 31.49(10.17,97.45) | 4.97(0.42) | 31.44(10.10) |
| 45-64 | Haematochezia | 3 | 5.88(1.89,18.29) | 5.86(1.89,18.12) | 2.55(-0.05) | 5.86(1.88) |
| 45-64 | Hepatic failure | 3 | 8.20(2.64,25.52) | 8.17(2.64,25.27) | 3.03(0.10) | 8.17(2.63) |
| 45-64 | Hypersensitivity | 3 | 1.76(0.57,5.47) | 1.75(0.57,5.43) | 0.81(-0.89) | 1.75(0.56) |
| 45-64 | Overdose | 3 | 2.40(0.77,7.45) | 2.39(0.77,7.39) | 1.26(-0.62) | 2.39(0.77) |
| 45-64 | Rash | 3 | 0.67(0.22,2.09) | 0.67(0.22,2.08) | -0.57(-1.90) | 0.67(0.22) |
| 45-64 | Rectal haemorrhage | 3 | 7.17(2.31,22.29) | 7.14(2.31,22.08) | 2.84(0.05) | 7.14(2.30) |
| 45-64 | Sepsis | 3 | 2.51(0.81,7.79) | 2.50(0.81,7.73) | 1.32(-0.59) | 2.50(0.80) |
| 45-64 | Subarachnoid haemorrhage | 3 | 26.97(8.67,83.92) | 26.85(8.68,83.08) | 4.74(0.40) | 26.81(8.62) |
| 45-64 | Syncope | 3 | 2.98(0.96,9.27) | 2.97(0.96,9.19) | 1.57(-0.46) | 2.97(0.96) |
| 45-64 | Urticaria | 3 | 1.73(0.56,5.38) | 1.73(0.56,5.34) | 0.79(-0.90) | 1.73(0.56) |
| 45-64 | Hepatic enzyme increased | 3 | 4.07(1.31,12.65) | 4.05(1.31,12.53) | 2.02(-0.25) | 4.05(1.30) |
| 45-64 | Embolism | 3 | 38.77(12.46,120.67) | 38.59(12.47,119.45) | 5.27(0.44) | 38.52(12.38) |
| 45-64 | Venous thrombosis limb | 3 | 110.68(35.49,345.16) | 110.15(35.52,341.65) | 6.78(0.51) | 109.58(35.14) |
| 45-64 | Thrombosis in device | 3 | 65.85(21.14,205.09) | 65.53(21.16,203.01) | 6.03(0.48) | 65.33(20.98) |
| 45-64 | Toxicity to various agents | 3 | 1.61(0.52,5.01) | 1.61(0.52,4.97) | 0.69(-0.97) | 1.61(0.52) |
| ≥65 | Coagulation time prolonged | 30 | 748.73(515.51,1087.46) | 722.47(503.68,1036.30) | 9.42(4.35) | 687.22(473.16) |
| ≥65 | International normalised ratio increased | 29 | 28.76(19.85,41.67) | 27.82(19.45,39.80) | 4.80(3.34) | 27.77(19.17) |
| ≥65 | Activated partial thromboplastin time prolonged | 25 | 192.94(129.28,287.96) | 187.32(126.97,276.35) | 7.53(3.94) | 184.87(123.87) |
| ≥65 | Cerebral infarction | 18 | 25.93(16.25,41.39) | 25.41(16.08,40.15) | 4.66(2.80) | 25.37(15.90) |
| ≥65 | Gastrointestinal haemorrhage | 16 | 5.94(3.62,9.75) | 5.85(3.60,9.51) | 2.55(1.48) | 5.85(3.57) |
| ≥65 | Haemorrhage | 15 | 9.36(5.62,15.60) | 9.21(5.58,15.21) | 3.20(1.88) | 9.21(5.52) |
| ≥65 | Cerebral haemorrhage | 12 | 11.81(6.68,20.88) | 11.66(6.64,20.45) | 3.54(1.87) | 11.65(6.59) |
| ≥65 | Haemorrhagic cerebral infarction | 12 | 541.67(303.16,967.83) | 534.08(301.27,946.78) | 9.01(2.85) | 514.57(288.00) |
| ≥65 | Death | 11 | 0.63(0.34,1.13) | 0.63(0.35,1.13) | -0.67(-1.46) | 0.63(0.35) |
| ≥65 | Drug ineffective | 11 | 0.93(0.51,1.69) | 0.93(0.52,1.68) | -0.10(-0.93) | 0.93(0.52) |
| ≥65 | Sepsis | 11 | 5.05(2.79,9.16) | 5.00(2.78,8.99) | 2.32(1.07) | 5.00(2.76) |
| ≥65 | Hepatic function abnormal | 10 | 13.44(7.20,25.07) | 13.29(7.17,24.62) | 3.73(1.77) | 13.28(7.12) |
| ≥65 | Platelet count decreased | 10 | 4.63(2.48,8.64) | 4.59(2.48,8.50) | 2.20(0.91) | 4.59(2.46) |
| ≥65 | Respiratory failure | 9 | 5.68(2.94,10.95) | 5.63(2.94,10.78) | 2.49(1.02) | 5.62(2.92) |
| ≥65 | Subarachnoid haemorrhage | 9 | 32.59(16.89,62.90) | 32.26(16.83,61.83) | 5.01(2.05) | 32.19(16.68) |
| ≥65 | Multiple organ dysfunction syndrome | 9 | 10.54(5.46,20.33) | 10.44(5.45,19.99) | 3.38(1.51) | 10.43(5.41) |
| ≥65 | Anaemia | 8 | 1.81(0.90,3.62) | 1.80(0.90,3.59) | 0.85(-0.24) | 1.80(0.90) |
| ≥65 | Cardiac arrest | 8 | 5.41(2.70,10.86) | 5.37(2.70,10.71) | 2.43(0.89) | 5.37(2.68) |
| ≥65 | Liver disorder | 8 | 11.73(5.84,23.53) | 11.63(5.83,23.18) | 3.54(1.45) | 11.62(5.79) |
| ≥65 | Deep vein thrombosis | 8 | 8.32(4.15,16.69) | 8.25(4.14,16.45) | 3.04(1.22) | 8.25(4.11) |
| ≥65 | Acute kidney injury | 8 | 1.66(0.83,3.33) | 1.66(0.83,3.30) | 0.73(-0.34) | 1.66(0.83) |
| ≥65 | Disseminated intravascular coagulation | 7 | 22.17(10.53,46.68) | 22.00(10.51,46.03) | 4.46(1.57) | 21.97(10.43) |
| ≥65 | Overdose | 7 | 5.20(2.47,10.94) | 5.17(2.47,10.81) | 2.37(0.74) | 5.16(2.45) |
| ≥65 | Pneumonia | 7 | 0.97(0.46,2.04) | 0.97(0.46,2.03) | -0.04(-1.06) | 0.97(0.46) |
| ≥65 | Prothrombin time prolonged | 7 | 44.13(20.95,92.95) | 43.77(20.91,91.65) | 5.45(1.76) | 43.64(20.72) |
| ≥65 | Thrombocytopenia | 7 | 3.24(1.54,6.83) | 3.23(1.54,6.75) | 1.69(0.31) | 3.22(1.53) |
| ≥65 | Coagulopathy | 6 | 17.73(7.94,39.60) | 17.61(7.93,39.11) | 4.14(1.29) | 17.59(7.88) |
| ≥65 | Medication error | 6 | 7.93(3.55,17.71) | 7.88(3.55,17.50) | 2.98(0.89) | 7.88(3.53) |
| ≥65 | Septic shock | 6 | 6.81(3.05,15.21) | 6.77(3.05,15.03) | 2.76(0.80) | 6.77(3.03) |
| ≥65 | Off label use | 6 | 0.54(0.24,1.21) | 0.54(0.25,1.21) | -0.88(-1.88) | 0.54(0.24) |
| ≥65 | Heparin-induced thrombocytopenia | 6 | 51.03(22.83,114.08) | 50.68(22.80,112.66) | 5.66(1.55) | 50.50(22.59) |
| ≥65 | Accidental overdose | 5 | 11.83(4.91,28.50) | 11.77(4.91,28.20) | 3.56(0.89) | 11.76(4.88) |
| ≥65 | Aspartate aminotransferase increased | 5 | 6.13(2.54,14.76) | 6.10(2.54,14.62) | 2.61(0.54) | 6.10(2.53) |
| ≥65 | Condition aggravated | 5 | 1.39(0.58,3.34) | 1.38(0.58,3.32) | 0.47(-0.80) | 1.38(0.57) |
| ≥65 | Epistaxis | 5 | 3.15(1.31,7.58) | 3.14(1.31,7.52) | 1.65(0.03) | 3.14(1.30) |
| ≥65 | Hepatic failure | 5 | 10.91(4.53,26.29) | 10.85(4.53,26.02) | 3.44(0.85) | 10.85(4.50) |
| ≥65 | Hypotension | 5 | 1.21(0.50,2.91) | 1.21(0.50,2.89) | 0.27(-0.96) | 1.21(0.50) |
| ≥65 | Hepatic enzyme increased | 5 | 7.54(3.13,18.17) | 7.50(3.13,17.99) | 2.91(0.66) | 7.50(3.11) |
| ≥65 | Renal impairment | 5 | 2.74(1.14,6.61) | 2.73(1.14,6.55) | 1.45(-0.10) | 2.73(1.13) |
| ≥65 | Alanine aminotransferase increased | 4 | 4.63(1.73,12.37) | 4.61(1.74,12.27) | 2.21(0.13) | 4.61(1.73) |
| ≥65 | Atrial fibrillation | 4 | 1.34(0.50,3.59) | 1.34(0.50,3.57) | 0.42(-0.97) | 1.34(0.50) |
| ≥65 | Bleeding time prolonged | 4 | 142.37(53.05,382.07) | 141.70(53.04,378.56) | 7.13(0.98) | 140.30(52.28) |
| ≥65 | Cardiac failure | 4 | 1.87(0.70,5.01) | 1.87(0.70,4.97) | 0.90(-0.62) | 1.87(0.70) |
| ≥65 | Cardiac tamponade | 4 | 34.93(13.06,93.39) | 34.77(13.06,92.54) | 5.12(0.87) | 34.69(12.97) |
| ≥65 | Depressed level of consciousness | 4 | 5.27(1.97,14.07) | 5.25(1.97,13.95) | 2.39(0.21) | 5.24(1.96) |
| ≥65 | Haemorrhagic infarction | 4 | 315.75(116.96,852.46) | 314.28(116.94,844.63) | 8.26(0.99) | 307.43(113.87) |
| ≥65 | Haemorrhagic stroke | 4 | 15.88(5.94,42.43) | 15.81(5.94,42.05) | 3.98(0.70) | 15.79(5.91) |
| ≥65 | Pneumonia aspiration | 4 | 6.18(2.31,16.51) | 6.16(2.32,16.37) | 2.62(0.30) | 6.15(2.30) |
| ≥65 | Skin discolouration | 4 | 6.47(2.42,17.29) | 6.45(2.43,17.15) | 2.69(0.33) | 6.45(2.41) |
| ≥65 | Thrombosis | 4 | 2.98(1.12,7.96) | 2.97(1.12,7.90) | 1.57(-0.20) | 2.97(1.11) |
| ≥65 | Blood alkaline phosphatase increased | 4 | 8.18(3.06,21.85) | 8.14(3.06,21.66) | 3.03(0.45) | 8.14(3.05) |
| ≥65 | Product administration error | 4 | 5.90(2.21,15.76) | 5.88(2.21,15.63) | 2.55(0.28) | 5.87(2.20) |
| ≥65 | Activated partial thromboplastin time abnormal | 3 | 492.33(155.40,1559.76) | 490.61(155.46,1548.22) | 8.89(0.51) | 474.10(149.65) |
| ≥65 | Blood bilirubin increased | 3 | 6.81(2.19,21.17) | 6.79(2.19,21.02) | 2.76(0.02) | 6.79(2.18) |
| ≥65 | Cardiac failure acute | 3 | 16.93(5.44,52.62) | 16.87(5.45,52.24) | 4.07(0.32) | 16.85(5.42) |
| ≥65 | Cardiogenic shock | 3 | 11.07(3.56,34.42) | 11.04(3.57,34.18) | 3.46(0.21) | 11.03(3.55) |
| ≥65 | Coagulation factor V level decreased | 3 | 432.05(136.70,1365.52) | 430.53(136.75,1355.41) | 8.71(0.52) | 417.77(132.18) |
| ≥65 | Fibrin D dimer increased | 3 | 42.98(13.81,133.77) | 42.83(13.82,132.78) | 5.42(0.45) | 42.71(13.72) |
| ≥65 | Haematocrit decreased | 3 | 6.95(2.23,21.58) | 6.92(2.24,21.43) | 2.79(0.03) | 6.92(2.23) |
| ≥65 | Haematoma | 3 | 3.94(1.27,12.23) | 3.93(1.27,12.15) | 1.97(-0.27) | 3.93(1.26) |
| ≥65 | Haemoglobin decreased | 3 | 1.30(0.42,4.03) | 1.30(0.42,4.01) | 0.37(-1.18) | 1.30(0.42) |
| ≥65 | Haemorrhage intracranial | 3 | 7.16(2.30,22.25) | 7.14(2.31,22.09) | 2.83(0.05) | 7.13(2.30) |
| ≥65 | International normalised ratio decreased | 3 | 25.50(8.20,79.31) | 25.42(8.21,78.73) | 4.67(0.39) | 25.37(8.16) |
| ≥65 | Intestinal ischaemia | 3 | 24.61(7.91,76.54) | 24.53(7.92,75.98) | 4.61(0.39) | 24.49(7.87) |
| ≥65 | Liver function test abnormal | 3 | 6.86(2.21,21.31) | 6.84(2.21,21.16) | 2.77(0.03) | 6.83(2.20) |
| ≥65 | Melaena | 3 | 3.68(1.18,11.43) | 3.67(1.19,11.35) | 1.87(-0.31) | 3.67(1.18) |
| ≥65 | Mouth haemorrhage | 3 | 20.01(6.43,62.21) | 19.94(6.44,61.75) | 4.32(0.35) | 19.91(6.40) |
| ≥65 | Muscle haemorrhage | 3 | 28.88(9.28,89.82) | 28.78(9.29,89.16) | 4.84(0.41) | 28.72(9.23) |
| ≥65 | Neutropenia | 3 | 1.38(0.45,4.30) | 1.38(0.45,4.28) | 0.47(-1.11) | 1.38(0.44) |
| ≥65 | Peripheral ischaemia | 3 | 33.44(10.75,104.03) | 33.33(10.76,103.27) | 5.06(0.43) | 33.25(10.69) |
| ≥65 | Prothrombin time shortened | 3 | 88.39(28.35,275.59) | 88.08(28.36,273.54) | 6.45(0.50) | 87.54(28.08) |
| ≥65 | Pulmonary alveolar haemorrhage | 3 | 22.93(7.37,71.31) | 22.86(7.38,70.79) | 4.51(0.37) | 22.82(7.34) |
| ≥65 | Pulmonary embolism | 3 | 2.06(0.66,6.39) | 2.05(0.66,6.35) | 1.04(-0.75) | 2.05(0.66) |
| ≥65 | Pyrexia | 3 | 0.62(0.20,1.93) | 0.62(0.20,1.92) | -0.68(-1.99) | 0.62(0.20) |
| ≥65 | Rectal haemorrhage | 3 | 2.87(0.92,8.93) | 2.87(0.93,8.87) | 1.52(-0.48) | 2.87(0.92) |
| ≥65 | Therapeutic response decreased | 3 | 5.82(1.87,18.10) | 5.81(1.88,17.97) | 2.54(-0.05) | 5.80(1.87) |
| ≥65 | Upper gastrointestinal haemorrhage | 3 | 4.74(1.53,14.74) | 4.73(1.53,14.64) | 2.24(-0.16) | 4.73(1.52) |
| ≥65 | Brain oedema | 3 | 24.34(7.83,75.71) | 24.26(7.83,75.15) | 4.60(0.38) | 24.22(7.79) |
| ≥65 | Post procedural haemorrhage | 3 | 15.21(4.89,47.29) | 15.16(4.90,46.94) | 3.92(0.29) | 15.15(4.87) |
| ≥65 | Dialysis | 3 | 11.78(3.79,36.62) | 11.74(3.79,36.36) | 3.55(0.22) | 11.73(3.78) |
| ≥65 | Ischaemic stroke | 3 | 5.64(1.81,17.52) | 5.62(1.82,17.40) | 2.49(-0.06) | 5.62(1.81) |
| ≥65 | Incorrect drug administration rate | 3 | 74.54(23.92,232.27) | 74.28(23.93,230.55) | 6.21(0.49) | 73.90(23.71) |
| ≥65 | Bronchial haemorrhage | 3 | 423.40(134.01,1337.75) | 421.92(134.06,1327.84) | 8.68(0.52) | 409.66(129.66) |
| ≥65 | Continuous haemodiafiltration | 3 | 154.52(49.43,483.05) | 153.99(49.45,479.46) | 7.25(0.52) | 152.33(48.73) |

**Supplementary Table S7.** The Drug-interaction with detailed data

| **DrugA** | **DrugB** | **PT** | **n111(Combined drug target ADRs)** | **Ω** | **Ω025** | **Ω095** |
| --- | --- | --- | --- | --- | --- | --- |
| Argatroban | Norepinephrine | Leukocytosis | 5 | 3.434864392 | 2.170286432 | 4.699442351 |
| Argatroban | Norepinephrine | Rhabdomyolysis | 5 | 3.301169535 | 2.036591575 | 4.565747494 |
| Argatroban | Norepinephrine | Blister | 4 | 3.074347341 | 1.660506201 | 4.488188482 |
| Argatroban | Norepinephrine | Thrombocytopenia | 5 | 2.909744593 | 1.645166633 | 4.174322552 |
| Argatroban | Warfarin | Drug interaction | 4 | 2.796132462 | 1.382291322 | 4.209973603 |
| Argatroban | Norepinephrine | Coagulopathy | 5 | 2.428404723 | 1.163826764 | 3.692982682 |
| Acetylsalicylic Acid | Argatroban | Labelled drug-drug interaction medication error | 3 | 2.656640227 | 1.024077101 | 4.289203353 |
| Argatroban | Norepinephrine | Toxicity to various agents | 3 | 2.570884026 | 0.938320901 | 4.203447152 |
| Argatroban | Heparin | Cardiac ventricular thrombosis | 7 | 1.864644462 | 0.795881019 | 2.933407905 |
| Argatroban | Edaravone | Cerebral infarction | 3 | 2.299453989 | 0.666890863 | 3.932017114 |
| Acetylsalicylic Acid | Argatroban | Subarachnoid haemorrhage | 3 | 2.193962455 | 0.56139933 | 3.826525581 |
| Argatroban | Heparin | Peripheral artery thrombosis | 3 | 2.055039706 | 0.42247658 | 3.687602831 |
| Argatroban | Heparin | Heparin-induced thrombocytopenia | 34 | 0.836008282 | 0.351064772 | 1.320951792 |
| Argatroban | Enoxaparin | Microembolism | 2 | 2.321844973 | 0.322371657 | 4.321318288 |
| Argatroban | Glucose | Wrong product stored | 2 | 2.321767175 | 0.32229386 | 4.32124049 |
| Argatroban | Danaparoid | Product name confusion | 2 | 2.320082091 | 0.320608776 | 4.319555407 |
| Argatroban | Cilostazol | Colon cancer | 2 | 2.308671998 | 0.309198683 | 4.308145314 |
| Argatroban | Cefotetan | Syncope | 2 | 2.301169535 | 0.301696219 | 4.30064285 |
| Argatroban | Bivalirudin | Intestinal ischaemia | 2 | 2.29600587 | 0.296532554 | 4.295479185 |
| Argatroban | Cilostazol | Supraventricular extrasystoles | 2 | 2.295536596 | 0.296063281 | 4.295009911 |
| Argatroban | Heparin | Cerebellar stroke | 2 | 2.290419338 | 0.290946023 | 4.289892654 |
| Argatroban | Heparin | Activated partial thromboplastin time abnormal | 3 | 1.878455556 | 0.24589243 | 3.511018681 |
| Argatroban | Bivalirudin | Incision site haemorrhage | 2 | 2.232360974 | 0.232887658 | 4.231834289 |
| Acetylsalicylic Acid | Argatroban | Haemorrhagic cerebral infarction | 2 | 2.205519337 | 0.206046021 | 4.204992652 |
| Argatroban | Heparin | Ejection fraction decreased | 2 | 2.190223302 | 0.190749986 | 4.189696617 |
| Acetylsalicylic Acid | Argatroban | Pulmonary haemorrhage | 2 | 2.18757275 | 0.188099435 | 4.187046066 |
| Alteplase | Argatroban | Gastrointestinal disorder | 2 | 2.163028099 | 0.163554784 | 4.162501414 |
| Argatroban | Heparin | Tachypnoea | 2 | 2.142439092 | 0.142965777 | 4.141912407 |
| Argatroban | Cilostazol | Anaemia | 2 | 2.126030072 | 0.126556756 | 4.125503387 |
| Alteplase | Argatroban | Melaena | 2 | 2.100769589 | 0.101296274 | 4.100242904 |
| Argatroban | Warfarin | International normalised ratio increased | 16 | 0.789162054 | 0.082241484 | 1.496082624 |
| Argatroban | Danaparoid | Inappropriate schedule of product administration | 2 | 2.07751442 | 0.078041104 | 4.076987735 |
| Argatroban | Danaparoid | Cerebral haemorrhage | 2 | 2.007546809 | 0.008073494 | 4.007020124 |
